# Supplementary material for: Controllable fabrication of BaF2self-assembled 3D Rubik's cube-like architectures emitting blue luminescence
Source: Royal Society of Chemistry journal article supplement (doi:10.1039/c6ce00221h), 2016-01-01
Supplement: c6ce00221h1.pdf [file c6ce00221h1.pdf]

## Supporting Information

### Controllable Fabrication of BaF<sub>2</sub> Self-assembled 3D Rubik's Cube

#### Architectures with Peculiar Luminescence

Hao Suo<sup>a</sup>, Zheng Yang<sup>a</sup>, Chongfeng Guo<sup>a\*</sup>, Xiaoqi Zhao<sup>a</sup>, Liangliang Zhang<sup>b</sup>

<sup>a</sup> National Key Laboratory of Photoelectric Technology and Functional Materials (Culture Base) in Shaanxi Province, Institute of Photonics & Photon-Technology, Northwest University, Xi'an, 710069, China

<sup>b</sup> State Key Laboratory for Manufacturing System Engineering, Xi'an, 710054, China

-----  
Author to whom correspondence should be addressed

E-mail: [guocf@nwu.edu.cn](mailto:guocf@nwu.edu.cn) (Prof. Guo);

Tel & Fax: ±86-29-88302661

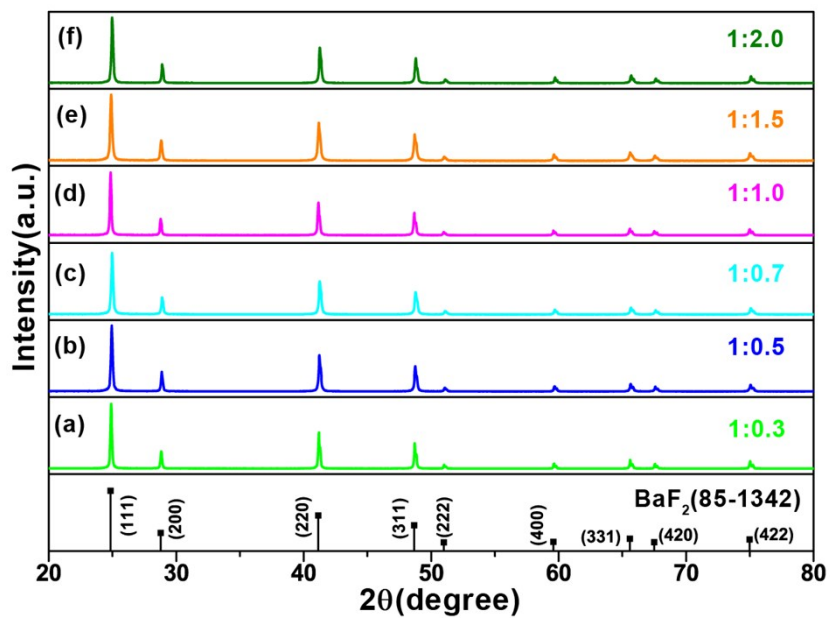

**Figure S1.** XRD patterns of the as-prepared BaF<sub>2</sub> samples with different molar ratios of Ba<sup>2+</sup> : Cit<sup>3-</sup> = (a) 1 : 0.3, (b) 1 : 0.5, (c) 1 : 0.7, (d) 1 : 1.0, (e) 1 : 1.5, (f) 1 : 2.0; and the standard data for BaF<sub>2</sub> (JCPDS NO. 85-1342) as a reference.
